# Supplementary material for: Highly ordered mesoporous titania with semi crystalline framework templated by large or small nonionic surfactants
Source: Royal Society of Chemistry journal article supplement (doi:10.1039/c0nj00488j), 2010-01-01

Supporting information S1 : Nitrogen adsorption-desorption isotherms (a) and pore size distribution (b) of the recovered titania prepared by using  $R^F_8(EO)_9$  ( $\circ$ ); P123 ( $\blacksquare$ ) and F127 ( $\blacktriangle$ ) as surfactants.

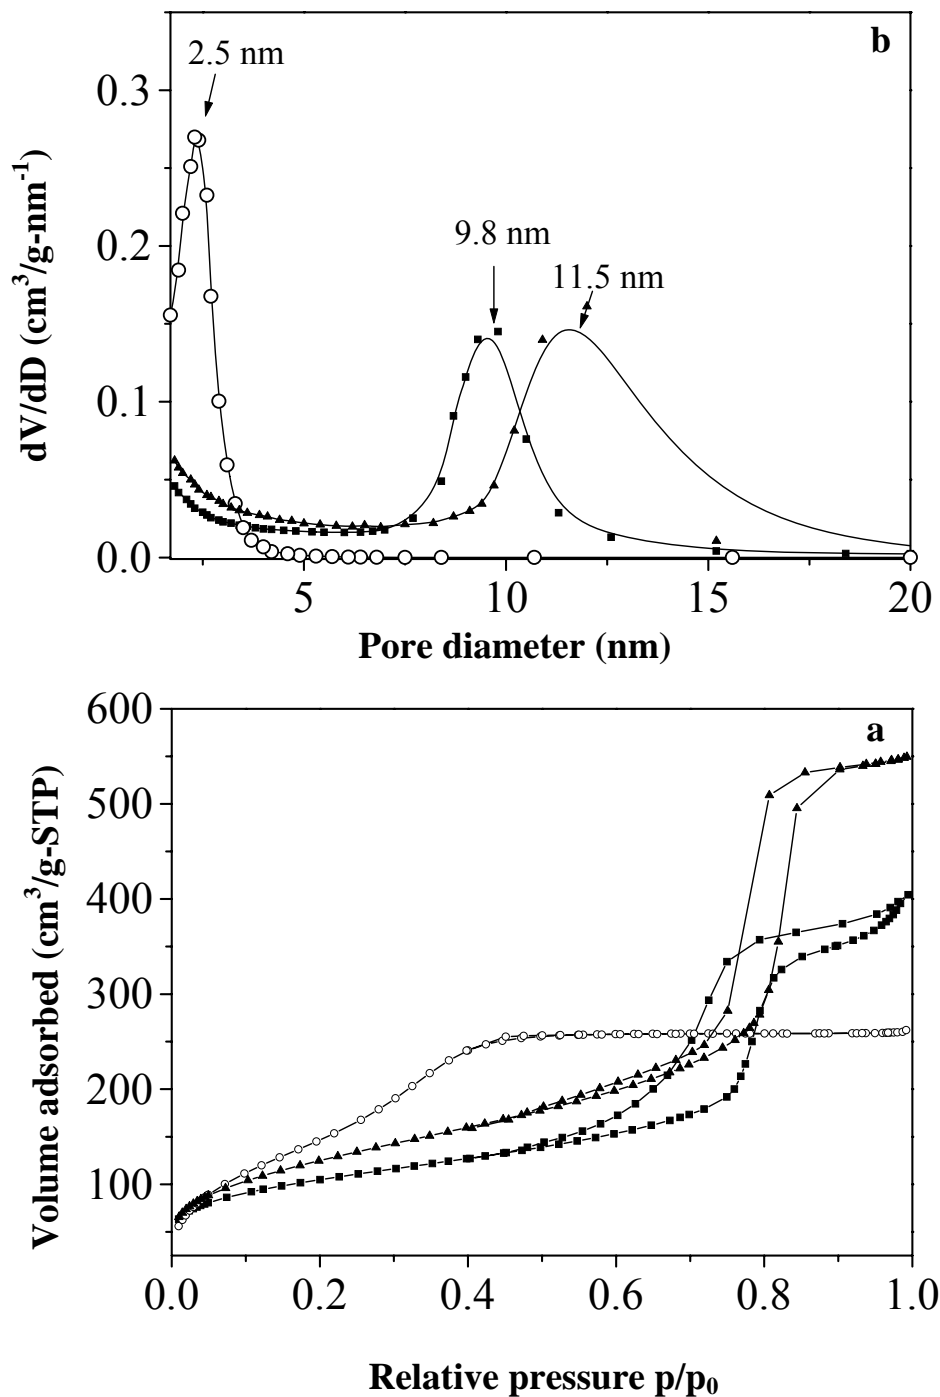

Supporting information S2 : Bright field TEM showing the anatase nanosized crystallite domain.

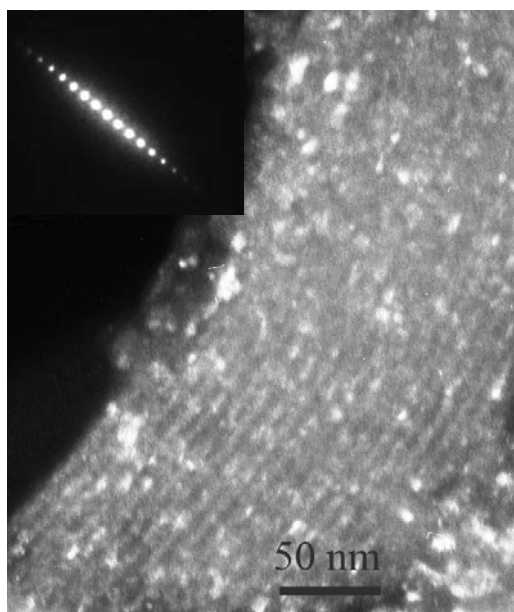

Supporting information S3 : Nitrogen adsorption-desorption isotherm of the amorphous titania (x) and of the recovered titania after calcination at 150 (◆), 250 (△), 350 (□), 450 (●) and 550°C (■).

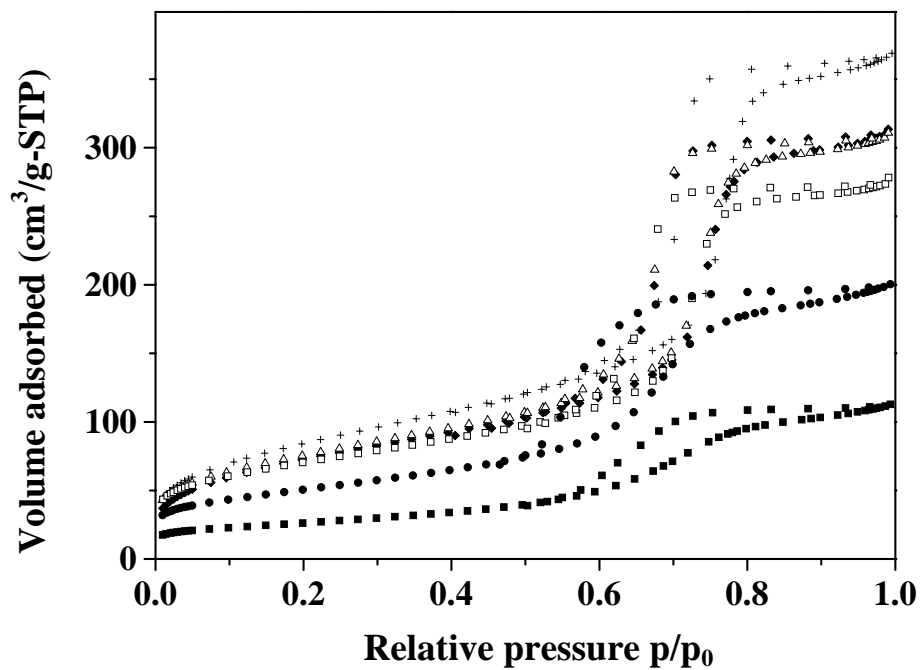

Supplement: c0nj00488j.pdf [file c0nj00488j.pdf]
